# Supplementary material for: mCherry fusions enable the subcellular localization of periplasmic and cytoplasmic proteins in Xanthomonas sp
Source: PubMed Central journal article supplement (PMC7392301; doi:10.1371/journal.pone.0236185), 2020-07-30
Supplement: pone.0236185.s003.pdf [file pone.0236185.s003.pdf]

**S1 Table.**

| <b>Species Description</b>                                                              | <b>% identity</b> | <b>Accession</b> |
|-----------------------------------------------------------------------------------------|-------------------|------------------|
| Xanthomonas citri subsp. citri A306, complete genome                                    | 100.00%           | CP006857.1       |
| Xanthomonas citri subsp. citri strain AW13                                              | 100.00%           | CP009031.1       |
| Xanthomonas citri pv. citri strain Xcc29-1 chromosome, complete genome                  | 100.00%           | CP023661.1       |
| Xanthomonas citri pv. glycines strain K2 chromosome, complete genome                    | 99.75%            | CP041967.1       |
| Xanthomonas citri pv. malvacearum strain HD-1 chromosome, complete genome               | 99.51%            | CP046019.1       |
| Xanthomonas citri pv. vignicola strain CFBP7113, complete genome                        | 98.39%            | CP022270.1       |
| Xanthomonas citri pv. fuscans CFBP 6988 chromosome                                      | 98.27%            | CP026331.1       |
| Xanthomonas citri pv. phaseoli var. fuscans strain CFBP6991 chromosome, complete genome | 98.27%            | CP021015.1       |
| Xanthomonas citri pv. anacardii CFBP 2913 chromosome                                    | 98.15%            | CP024057.1       |
| Xanthomonas fuscans subsp. aurantifolii strain FDC 1561, complete genome                | 98.15%            | CP011250.1       |
| Xanthomonas fuscans subsp. fuscans strain ISO118C5, complete genome                     | 98.02%            | CP012051.1       |
| Xanthomonas perforans strain LH3 chromosome, complete genome                            | 94.93%            | CP018475.1       |
| Xanthomonas axonopodis pv. commiphoreae strain LMG26789 chromosome, complete genome     | 94.81%            | CP031059.1       |
| Xanthomonas euvesicatoria strain LMG930, complete genome                                | 94.56%            | CP018467.1       |
| Xanthomonas campestris pv. vesicatoria complete genome                                  | 94.56%            | AM039952.1       |
| Xanthomonas axonopodis pv. citrumelo F1, complete genome                                | 94.31%            | CP002914.1       |
| Xanthomonas arboricola strain 17, complete genome                                       | 86.16%            | CP011256.1       |

|                                                                            |        |            |
|----------------------------------------------------------------------------|--------|------------|
| Xanthomonas arboricola pv. pruni strain 15-088 chromosome, complete genome | 85.89% | CP044334.1 |
| Xanthomonas arboricola pv. juglandis strain Xaj 417 genome                 | 85.78% | CP012251.1 |
