# Supplementary material for: mCherry fusions enable the subcellular localization of periplasmic and cytoplasmic proteins in Xanthomonas sp
Source: PubMed Central journal article supplement (PMC7392301; doi:10.1371/journal.pone.0236185), 2020-07-30
Supplement: pone.0236185.s004.pdf [file pone.0236185.s004.pdf]

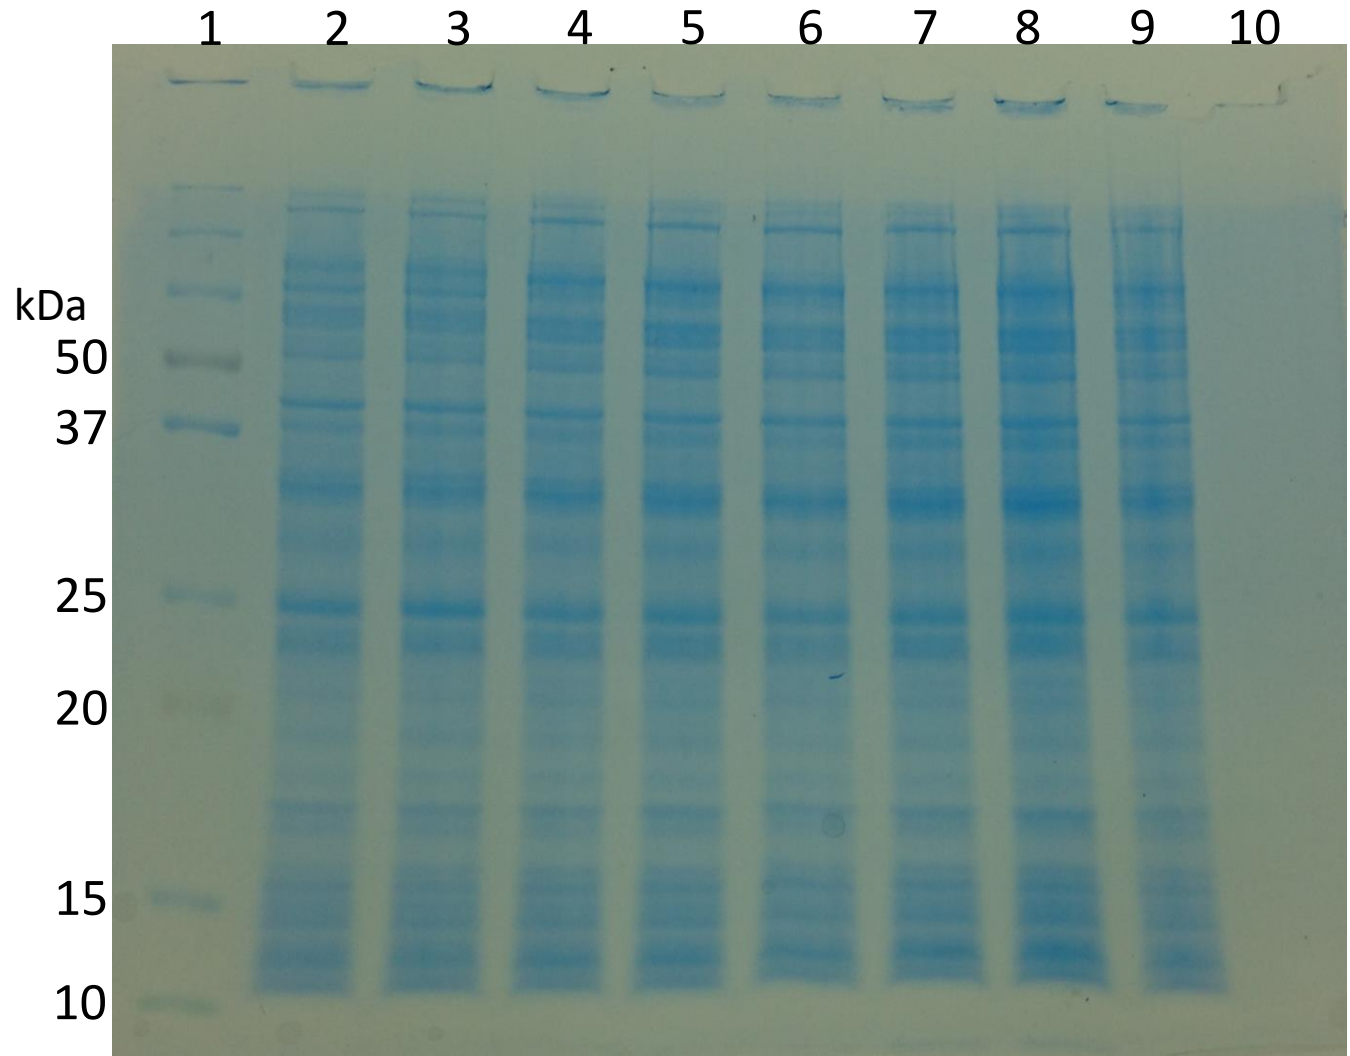

Samples in the wells :

Lane 1: Molecular Marker

Lane 2: *X. citri* 306 + arabinose

Lane 3: *X. citri* 306

Lane 4: *X. citri* pMAJIIc

Lane 5: *X. citri* pMAJIIc

Lane 6: *X. citri* pMAJIIc

Lane 7: *X. citri* pMAJIIc + arabinose

Lane 8: *X. citri* pMAJIIc + arabinose

Lane 9: *X. citri* pMAJIIc + arabinose

Lane 10: Empty

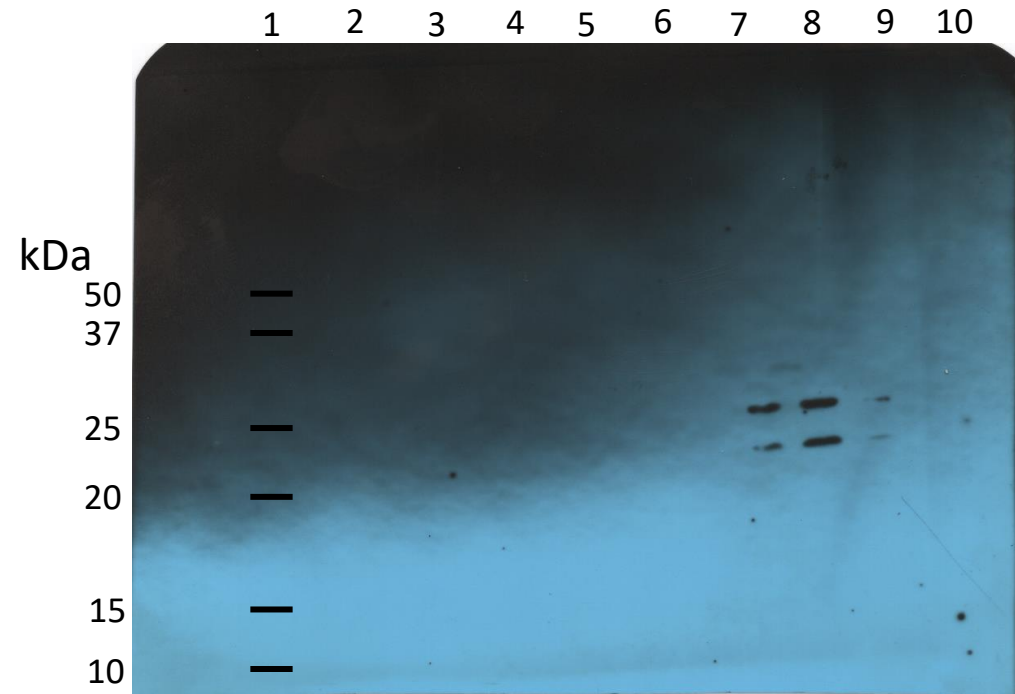

Samples in the wells:

Lane 1: Molecular Marker

Lane 2: *X. citri* 306 + arabinose

Lane 3: *X. citri* 306

Lane 4: *X. citri* pMAJIIc

Lane 5: *X. citri* pMAJIIc

Lane 6: *X. citri* pMAJIIc

Lane 7: *X. citri* pMAJIIc + arabinose

Lane 8: *X. citri* pMAJIIc + arabinose

Lane 9: *X. citri* pMAJIIc + arabinose

Lane 10: Empty

S1\_raw\_images: Comassie and Western Blot raw images were used to generate Figure 5A
